# Supplementary material for: The impact of vestibular dysfunction on falls and postural instability in individuals with type 2 diabetes with and without diabetic polyneuropathy
Source: PeerJ. 2023 Nov 13;11:e16382. doi: 10.7717/peerj.16382 (PMC10652841; doi:10.7717/peerj.16382)
Supplement: Supplemental Information 1 [file peerj-11-16382-s001.xlsx]

## Sheet: Ark1
groups	age	gender	height	weight	bmi	waist	diabetesduration	Oral anti-diabetes agents	insulin	hba1c	Falls	Average ST in neutral positions	Average ST in tilt/turn positions	Average ST in all positions
Control	65	Male	1.8	86	26.5432	96		No	No	39	No	35.985	57.9825	46.9838
Control	50	Female	1.66	77.8	28.2334			No	No	29	No	15.2075	14.8825	15.045
Control	68	Female	1.67	59	21.1553	72		No	No	38	Yes	26.3925	26.7775	26.585
Control	55	Male	1.73	111	37.0878	119.5		No	No	44	No	17.8325	23.1825	20.5075
Control	52	Female	1.78	75	23.6713	96.5		No	No	41	No	18.0525	17.6675	17.86
Control	77	Male	1.73	78	26.0617	101		No	No	42	Yes	23.6075	40.755	32.1812
Control	71	Male	1.71	81	27.7008	96		No	No	39	Yes	13.0925	22.22	17.6562
Control	61	Male	1.76	77	24.8579	84		No	No	34	No	25.9425	38.1975	32.07
Control	74	Male	1.895	81	22.5562	97		No	No	37	No	28.435	31.925	30.18
Control	51	Female	1.77	77	24.5779	77.5		No	No	33	No	14.61	18.42	16.515
Control	53	Female	1.73	71	23.7228	90		No	No	37	Yes	16.395	22.32	19.3575
Control	65	Male	1.77	96	30.6425	107.5		No	No	38	No	18.5	23.13	20.815
Control	64	Male	1.78	92	29.0367	111		No	No	36	No	21.265	27.5125	24.3888
Control	58	Female	1.71	125	42.7482	138		No	No	43	No	32.725	45.0475	38.8862
Control	60	Female	1.68	72	25.5102	83		No	No	38	No	22.4075	29.5675	25.9875
Control	64	Female	1.7	65	22.4914	86		No	No	34	No	15.305	16.3875	15.8462
Control	65	Male	1.86	102	29.4832	109		No	No	35	No	20.77	27.925	24.3475
Control	57	Female	1.735	96	31.8913	111		No	No	31	No	27.0075	30.3325	28.67
Control	78	Female	1.57	43	17.4449	65		No	No	37	Yes	16.5575	20.21	18.3837
Control	64	Female	1.71	75	25.6489	103.5		No	No	35	No	29.5675	40.985	35.2762
Control	65	Female	1.65	81	29.7521	109.5		No	No	35	No	21.72	28.4475	25.0837
Control	58	Female	1.63	65.5	24.6528	83.5		No	No	30	No	16.845	14.445	15.645
Control	66	Male	1.78	103	32.5085	108.5		No	No	36	No	28.3625	25.2025	26.7825
Control	56	Male	1.73	92.8	31.0067	104.5		No	No	36	No	34.8375	32.81	33.8237
Control	68	Male	1.78	67	21.1463	92		No	No	34	No	17.3975	22.7775	20.0875
Control	62	Male	1.9	112	31.0249	115		No	No	34	No	46	39.825	42.9125
Control	71	Male	1.8	100	30.8642	111.5		No	No	45	No	24.2925	23.805	24.0487
Control	64	Male	1.79	91	28.4011	102		No	No	40	No	23.7025	31.475	27.5888
Control	68	Male	1.77	95	30.3233	107.5		No	No	38	No	34.075	47.78	40.9275
Control	65	Female	1.7	122	42.2145	142.5		No	No	40	No	26.7425	41.505	34.1238
Control	49	Male	1.79	91	28.4011	90.5		No	No	35	No	31.18	36.2675	33.7238
Control	40	Male	1.83	90	26.8745	97		No	No	36	No	14.3825	16.3025	15.3425
TD2	58	Female	1.68	92	32.5964	105	8	Yes	No	45	No	14.745	24.9725	19.8588
TD2	69	Male	1.75	76	24.8163	106	18	Yes	No	55	No	21.95	30.455	26.2025
TD2	72	Male	1.72	86	29.0698	101	5	Yes	No	51	Yes	31.995	36.17	34.0825
TD2	67	Male	1.69	103	36.0632		6	Yes	No	42	No	39.0575	44.685	41.8713
TD2	75	Male	1.78	97	30.6148	122.5	15	Yes	No	54	No	45.23	49.2875	47.2587
TD2	74	Female	1.71	82.5	28.2138	103	10	Yes	Yes	64	Yes	30.65	40.4075	35.5288
TD2	49	Female	1.69	74	25.9095	95	3	Yes	No	49	No	20.585	18.4175	19.5012
TD2	54	Female	1.74	94	31.0477	108	7	No	Yes	70	No	26.5125	26.86	26.6863
TD2	67	Male	1.73	114	38.0902	127	11	Yes	No	61	No	29.3175	36.0325	32.675
TD2	60	Male	1.85	106	30.9715	123.5	8	No	No	40	Yes	27.035	42.1225	34.5787
TD2	63	Female	1.67	74	26.5338	96	10	Yes	No	52	No	26.325	22.21	24.2675
TD2	65	Male	1.68	96	34.0136	116.5	3	Yes	No	59	No	26.22	36.545	31.3825
TD2	61	Female	1.63	94	35.3796	110.5	7	No	No	45	Yes	37.0675	44.8725	40.97
TD2	71	Female	1.6	65	25.3906	93	8	Yes	No	50	Yes	17.235	24.16	20.6975
TD2	35	Male	1.8	103	31.7901	111.5	4	No	No	37	No	16.0875	19.8775	17.9825
TD2	63	Female	1.65	96	35.2617	116	5	Yes	No	45	No	29.56	39.2325	34.3963
TD2	57	Male	1.73	124	41.4314	128	6	Yes	No	41	No	37.725	46.1275	41.9263
TD2	72	Male	1.71	110	37.6184	128.5	15	Yes	No	48	No	41.3225	66.8225	54.0725
TD2	57	Female	1.69	102	35.713	119.5	0	Yes	No	45	Yes	18.4825	26.25	22.3663
TD2	64	Male	1.86	94	27.1708	104.5	6	Yes	No	46	No	33.6175	46.265	39.9412
TD2	46	Female	1.6	100	39.0625	125	5	Yes	No	78	Yes	22.99	24.26	23.625
TD2	71	Male	1.75	74	24.1633	92	6	Yes	No	47	No	30.0075	32.595	31.3012
TD2	48	Female	1.69	131	45.8667	135	6	Yes	No	40	Yes	15.505	23.6775	19.5912
TD2	65	Female	1.62	83	31.6263	110.5	24	Yes	Yes	70	No	32.58	36.48	34.53
TD2	59	Male	1.79	99	30.8979	106.5	15	Yes	No	56	No	24.8	31.645	28.2225
TD2	65	Female	1.59	97.2	38.4479	104.5	7	Yes	No	45	Yes	42.905	45.715	44.31
TD2	70	Male	1.75	67	21.8775	106.5	10	Yes	No	53	No	36.4475	42.005	39.2263
TD2	69	Female	1.61	69	26.6193	94	7	Yes	No	42	No	21.5725	21.915	21.7437
TD2	64	Female	1.54	76	32.0459	101	8	Yes	No	49	No	24.4825	27.6125	26.0475
TD2	64	Male	1.66	89	32.2979	106.5	8	Yes	No	47	Yes	28.37	28.8625	28.6163
TD2	70	Female	1.6	45	17.5781	74	16	No	No	43	Yes	32.4525	40.335	36.3937
TD2	71	Female	1.65	66	24.2424	94.5	6	Yes	No	45	Yes	24.59	24.7775	24.6837
DSPN	56	Male	1.81	119	36.3237	121.5	2	Yes	No	48	No	28.3675	37.7025	33.035
DSPN	72	Female	1.64	83	30.8596	105.5	18	Yes	No	49	No
DSPN	62	Male	1.81	111	33.8817	121	4	Yes	Yes	73	No	24.4325	32.29	28.3612
DSPN	58	Male	1.78	86	27.143	106.5	21	No	Yes	63	No	35.8075	48.915	42.3612
DSPN	64	Female	1.6	126	49.2188	145	14	Yes	Yes	54	Yes	76.045	97.32	86.6825
DSPN	63	Male	1.84	121	35.7396	123.5	19	Yes	Yes	60	Yes	40.5875	62.79	51.6887
DSPN	66	Male	1.88	125	35.3667	122	10	Yes	No	56	Yes	107.8	104.612	106.206
DSPN	68	Male	1.77	109	34.7921	113	10	Yes	Yes	66	No	23.175	38.5275	30.8513
DSPN	45	Female	1.73	108	36.0854	123	3	Yes	Yes	72	No	20.2925	29.0325	24.6625
DSPN	66	Male	1.75	75	24.4898	96.5	8	Yes	No	39	No	48.1875	59.84	54.0138
DSPN	68	Male	1.73	105	35.083	134.5	23	Yes	Yes	70	No	37.0725	57.66	47.3663
DSPN	64	Male	1.78	102	32.1929	112.5	11	Yes	Yes	79	Yes	56.1875	95.6375	75.9125
DSPN	66	Male	1.78	116	36.6115	127.5	8	Yes	No	45	No	32.595	33.92	33.2575
DSPN	73	Female	1.5	72	32	106.5	9	Yes	Yes	95	No	64.8025	68.19	66.4963
DSPN	70	Female	1.58	93	37.2537	125.5	3	Yes	No	51	No	26.8325	30.81	28.8212
DSPN	68	Male	1.8	99	30.5556	118	18	No	Yes	82	Yes	73.8025	101.743	87.7725
DSPN	67	Male	1.8	130	40.1235	133.5	12	Yes	No	48	No	46.185	48.1625	47.1737
DSPN	69	Male	1.9	96	26.5928	106.5	3	Yes	No	43	No	39.8425	67.025	53.4338
DSPN	62	Male	1.76	90	29.0547	113	10	Yes	No	60	No	63.185	104.35	83.7675
DSPN	73	Male	1.79	111	34.6431	118	4	Yes	No	56	Yes	28.635	35.425	32.03
DSPN	62	Female	1.62	113	43.0575	136	22	Yes	Yes	72	Yes	80.545	120.368	100.456
DSPN	64	Male	1.87	114	32.6003	121.5	13	Yes	Yes	69	No	45.3175	67.3325	56.325
DSPN	50	Female	1.82	101	30.4915	111	20	Yes	No	52	No	17.27	25.5175	21.3938
DSPN	76	Female	1.68	99	35.0765	115	1	Yes	Yes	47	No	32.8375	40.98	36.9087
DSPN	61	Male	1.8	93	28.7037	112	4	Yes	No	48	No	39.1175	64.395	51.7563
DSPN	61	Female	1.51	56	24.5603	97	10	No	Yes	68	Yes	42.41	42.46	42.435
DSPN	66	Male	1.85	108	31.5559	118	38	Yes	Yes	63	Yes	58.3975	95.9975	77.1975
DSPN	58	Male	1.77	83	26.493	97	6	Yes	Yes	53	Yes	30.455	42.3275	36.3912
DSPN	55	Female	1.64	109	40.5265	123.5	8	Yes	No	56	Yes	67.71	112.625	90.1675
DSPN	62	Male	1.75	80	26.1225	102	24	Yes	No	71	No	21.2	17.6025	19.4013
DSPN	54	Female	1.62	110	41.9143	129	2	Yes	No	50	No	46.68	79.9425	63.3113
DSPN	60	Male	1.71	123	42.0642	141.5	6	Yes	Yes	40	Yes	94.32	170.765	132.542
DSPN	64	Male	1.8	128	39.5062	145	10	Yes	Yes	52	No	77.41	106.123	91.7662
DSPN	67	Male	1.71	109	37.2764	124	11	Yes	Yes	64	No	30.1	38.775	34.4375
DSPN	71	Male	1.84	100	29.5369	119.5	10	Yes	Yes	55	No
DSPN	69	Female	1.69	95	33.2621	116	5	Yes	No	42	Yes	25.2275	36.0675	30.6475
DSPN	79	Male	1.8	132	40.7407	143	20	No	No	48	Yes
DSPN	56	Female	1.63	69	25.9701	95	15	Yes	No	95	No	44.31	59.34	51.825
DSPN	58	Male	1.77	121	38.6224	124.5	23	Yes	Yes	51	No	40.7375	57.7525	49.245
DSPN	54	Male	1.79	97	30.2737	112	15	Yes	No	42	No	25.825	38.4	32.1125
DSPN	60	Male	1.61	96	37.0356	125	13	Yes	No	52	No	41.4375	72.2575	56.8475
DSPN	72	Male	1.75	84	27.4286	107	18	No	Yes	64	Yes	66.5475	88.0225	77.285
DSPN	62	Male	1.76	116	37.4483	131.5	18	Yes	No	60	No	79.3175	81.365	80.3413
