# Supplementary material for: The impact of vestibular dysfunction on falls and postural instability in individuals with type 2 diabetes with and without diabetic polyneuropathy
Source: PeerJ. 2023 Nov 13;11:e16382. doi: 10.7717/peerj.16382 (PMC10652841; doi:10.7717/peerj.16382)
Supplement: Supplemental Information 2 [file peerj-11-16382-s002.xlsx]

## Sheet: Ark1
groups	cVemp p13 R	cVemp n23 R	cVemp p13 L	cVemp n23 L	p13- n23 SCALED R	p13- n23 SCALED L	oVemp n10 R	oVemp n15 R	oVemp n10 L	oVemp n15 L	n10-n15 R	n10-n15 L
Control	0	0	0	0	0	0	36.33	33	38.67	31.33	8.255	6.77
Control	14.67	23.67	16.33	26	0.543	0.919	15.33	9.67	14.67	10	26.49	22.15
Control	31	37.67	46.67	55	0.533	0.309	27.67	23	25.33	21.67	4.538	4.501
Control	16	22.67	15	22.67	0.778	0.95	0	0	0	0	0	0
Control	15.33	25.33	14.67	24.67	1.881	1.762	16.33	10.33	16.33	11.33	14.27	11.27
Control	16.67	24	15.33	23.67	0.683	0.446	31.33	25.67	0	0	9.273
Control	0	0	0	0	0	0
Control	0	0	0	0	0	0
Control	47	56.33	15.33	24.33	0.763	1.306	0	0	0	0	0	0
Control							17.33	11	16.33	11.67	10.35	9.236
Control	16	25.67	14.67	25.33	0.789	0.797	16.33	10	17	10	32.61	28.29
Control	17.67	27.33	14.67	23.33	0.611	0.676	14.67	10	16.67	10.33	22.04	14.2
Control							14	11	16.67	11.67	12.08	6.513
Control	15.67	24.33	16.33	24.33	0.468	0.691	29.33	23.67	29.67	24.33	6.292	6.341
Control	0	0	16.33	26.33	0	0	16.67	11	16.67	12.33	20.92	18.76
Control	16.67	25.33	14.67	23.67	0.399	0.493	0	0	0	0	0	0
Control	16	26	15.67	26	1.218	0.742	15.67	11	18	11.67	11.13	6.133
Control							14.33	11	16.67	11.33	19.35	18.09
Control	16	26	14.33	23.33	1.219	0.463	0	0	0	0	0	0
Control	15	23.33	15.67	24	1.001	1.256	0	0	16	11	0	6.501
Control	16	26.67	15.67	26	2.492	2.964	30.67	26	33	27.33	11.03	6.415
Control	0	0	0	0	0	0
Control	15.33	24.33	15	23.67	0.713	0.5	0	0	0	0	0	0
Control	15.33	23.67	15	22.33	0.373	1.298	0	0	0	0	0	0
Control	14	22	15.67	25.33	0.404	0.697	14.67	11	0	0	4.354	0
Control	14	25	16.33	29.67	0.737	0.902	0	0	34	23.33	0	20
Control	15.67	24	16	24.33	1.109	1.877	14	10.67	14.33	10.67	8.635	6.746
Control	16.67	24.33	15.67	24	1.229	1.007	14	11	0	0	0	0
Control	17	24.67	14.67	25.67	0.387	0.407	0	0	0	0	0	0
Control	40	50.67	38.67	56.67	0.688	0.74	35.67	29.67	35.33	28	8.426	9.506
Control	15.67	23.67	17	25	0.959	0.217	0	0	0	0	0	0
Control	16	25.67	15.33	25.67	2.168	2.226	17	9.33	17	10.67	22.67	31.53
TD2	14.33	21	14.33	22.67	0.574	0.608	15.33	10	14	10.33	26.73	22.34
TD2	45	58.33	14.33	23.67	0.605	0.662	0	0	0	0	0	0
TD2	15.33	23.33	15	24	1.507	1.103	0	0	0	0	0	0
TD2	0	0	0	0	0	0
TD2	0	0	0	0	0	0	0	0	0	0	0	0
TD2	10	17.33	16.33	23	0.378	0.348	17.67	11	14.67	11	9.15	4.097
TD2	15.33	21.33	16.67	24	1.176	0.676	13.33	9.67	14.67	10	19.36	24.01
TD2	17.67	26.67	13.67	23.67	0.466	0.548	15.33	9.33	14.67	9.67	33.19	22.49
TD2	15	23.67	15.33	22.67	1.519	0.877	30	25.67	29.67	24.67	6.513	13.5
TD2	17.67	32	18	33	1.344	1.796	0	0	0	0	0	0
TD2	16.33	26	14	24.33	0.86	0.577	16.33	10.67	0	0	6.55	0
TD2	16	25.67	14.67	25.33	0.789	0.797	41	33.67	45.67	33.33	12.71	17
TD2	15	23.33	15.67	24	1.001	1.256	0	0	0	0	0	0
TD2	15.67	24.33	20	29.33	0.569	0.302	0	0	0	0	0	0
TD2	0	0	0	0	0	0	15	10.67	16.33	10	36.82	17.93
TD2	43.33	51.33	15.67	21	0.422	0.546	0	0	0	0	0	0
TD2	16.33	24.67	14	22.67	1.085	0.872	45	31.67	47	32.67	54.44	58.45
TD2	15	21.33	16.33	22.67	0.784	0.585	0	0	0	0	0	0
TD2	14.67	27.33	16	27.33	1.336	0.867	0	0	0	0	0	0
TD2	15.67	24.33	16.33	24.33	0.627	0.58	0	0	0	0	0	0
TD2	14.33	23.67					0	0	0	0	0	0
TD2	15.33	26.33	16.33	26.33	1.107	1.349	27.33	22	36.67	30	16.11	12.11
TD2	11.67	16.67	16.33	29	0.264	0.805	0	0	0	0	0	0
TD2	17.33	27.33	15.33	24.33	0.575	0.385	33.33	30.33	37	31	7.335	10.19
TD2	15.33	23	14.67	22	0.884	0.909	26.33	22.33	29.33	23	11.71	13.32
TD2	14.33	22.33	15	23.67	1.255	1.092	0	0	0	0	0	0
TD2	14.67	27.33	16	27.33	1.336	0.867	0	0	0	0	0	0
TD2	13.67	21.67	13.67	24.33	0.414	0.583	13.33	11	15.67	11.33	7.335	7.654
TD2	15.33	23	17	25.67	0.852	0.888	0	0	0	0	0	0
TD2	0	0	0	0	0	0	14.33	9.67	18.33	14.67	9.788	5.384
TD2	17	22.67	15.33	23.67	0.466	1.465	15.67	11.33	14	10.67	9.248	3.925
TD2	14.33	23.67	14.33	22.33	0.92	1.152	0	0	14	10.33	0	7.322
DSPN	16	24	15.67	25.67	0.872	1.197	17.33	14	16	13	5.323	4.133
DSPN	15.67	25.67	12.33	25.33	0.62	0.535	15.67	11	0	0	8.365	0
DSPN	17.67	25	16.67	25	0.887	0.693	50	43.33	0	0	0	26.88
DSPN	16.67	24.33	16.67	26.33	0.854	1.008	0	0	0	0	0	0
DSPN	18.67	28	16.67	26.33	0.298	0.305	0	0	0	0	0	0
DSPN	16.33	27.67	0	0	0	0	0	0	0	0	0	0
DSPN	0	0	16.33	26	0	0	19.67	11.67	19	12.33	7.163	16.38
DSPN	17.67	25	16.67	25	0.887	0.693	0	0	0	0	0	0
DSPN	18.33	27	14.67	22.33	0.489	0.348	44.33	37	48.67	39	37.53	43.49
DSPN	15.67	26.33	16.67	24.33	0.896	0.385	16.33	11	13.33	10.33	4.698	7.175
DSPN	18.33	23.67	14.33	25.67	0.39	0.46	0	0	0	0	0	0
DSPN	0	0	0	0	0	0	0	0	0	0	0	0
DSPN	31	41	0	0	0	0	0	0	0	0	0	0
DSPN	0	0	0	0	0	0	0	0	0	0	0	0
DSPN	16	26	15	25.67	1.881	1.476	0	0	0	0	0	0
DSPN	0	0	0	0	0	0	0	0	0	0	0	0
DSPN	16.33	26	18.33	26.67	0.595	0.883	22.67	16.33	29.67	24	13.95	13.6
DSPN	0	0	18.33	26.67	0	0	0	0	0	0	0	0
DSPN	0	0	0	0	0	0	16.33	10.67	18	10.67	6.501	7.519
DSPN	0	0	0	0	0	0	0	0	0	0	0	0
DSPN	0	0	0	0	0	0	27.67	23.67	19.33	13	11.77	18.85
DSPN	16	23.33	17.33	26.33	0.657	0.783	0	0	0	0	0	0
DSPN	15.67	25	17.67	27.67			0	0	0	0	0	0
DSPN	0	0	0	0	0	0	27.67	22.67	0	0	7.187	0
DSPN	18.67	28.33	20.33	26.67	0.477	0.289	0	0	0	0	0	0
DSPN	14	21.67	15.67	22.67	1.022	1.086	0	0	0	0	0	0
DSPN	18.33	27	16.67	24.33	0.864	0.627	0	0	0	0	0	0
DSPN	16	26	15	25.67	1.881	1.476	0	0	0	0	0	0
DSPN	38	47.67	15.67	23.67	0.396	0.598	14.67	11.33	0	0	7.31	0
DSPN	16.67	24.33	15.67	24	1.229	1.007	0	0	0	0	0	0
DSPN	30	42.67	26.67	38	0.293	0.535	29	23.33	28	23.67	8.291	4.526
DSPN	15	22	16.33	25.33	0.606	0.94	16	11	18	11.67	23.59	71.04
DSPN	15.33	23.33	16	25.67	0.533	0.369	39.33	29.67	40.67	32.33	14	10.03
DSPN	18	27.33	19	26.33	0.696	0.484	0	0	0	0	0	0
DSPN							15.33	11	14	12	4.379	3.263
DSPN	14.67	23	17.67	24.67	0.202	0.322	0	0	0	0	0	0
DSPN	15.67	25	17.67	27.67			0	0	0	0	0	0
DSPN	15	25	15.33	23.33	1.151	0.954	25.33	22	15.33	10.33	4.808	10.6
DSPN	14	22	16.67	25.67	0.427	1.22	0	0	0	0	0	0
DSPN	16	24.67	16	25.67	1.026	0.622	0	0	0	0	0	0
DSPN	16	26	14.33	23.33	1.219	0.463	0	0	0	0	0	0
DSPN							15	11.67	0	0	16.96	0
DSPN	16	25	16.67	25.67	0.841	9.511	36.33	33	38.67	31.33	8.255	6.77
