# Supplementary material for: The impact of vestibular dysfunction on falls and postural instability in individuals with type 2 diabetes with and without diabetic polyneuropathy
Source: PeerJ. 2023 Nov 13;11:e16382. doi: 10.7717/peerj.16382 (PMC10652841; doi:10.7717/peerj.16382)
Supplement: Supplemental Information 3 [file peerj-11-16382-s003.xlsx]

## Sheet: Ark1
falls	cVemp p13 R	cVemp n23 R	cVemp p13 L	cVemp n23 L	p13- n23 SCALED R	p13- n23 SCALED L	oVemp n10 R	oVemp n15 R	oVemp n10 L	oVemp n15 L	n10-n15 R	n10-n15 L
No	0	0	0	0	0	0
No	45	58.33	14.33	23.67	0.605	0.662
No	16.33	24.67	14	22.67	1.085	0.872	45	31.67	47	32.67	54.44	58.45
No	15	23.67	15.33	22.67	1.519	0.877	30	25.67	29.67	24.67	6.513	13.5
No	15.67	24.33	16.33	24.33	0.627	0.58
No	14.33	21	14.33	22.67	0.574	0.608	15.33	10	14	10.33	26.73	22.34
No	15	21.33	16.33	22.67	0.784	0.585
No	13.67	21.67	13.67	24.33	0.414	0.583	13.33	11	15.67	11.33	7.335	7.654
No	16	25.67	14.67	25.33	0.789	0.797	41	33.67	45.67	33.33	12.71	17
No	0	0	0	0	0	0	15	10.67	16.33	10	36.82	17.93
No	15.33	21.33	16.67	24	1.176	0.676	13.33	9.67	14.67	10	19.36	24.01
No	15.33	23	17	25.67	0.852	0.888
No	17.33	27.33	15.33	24.33	0.575	0.385	33.33	30.33	37	31	7.335	10.19
No	15.33	26.33	16.33	26.33	1.107	1.349	27.33	22	36.67	30	16.11	12.11
No	17.67	26.67	13.67	23.67	0.466	0.548	15.33	9.33	14.67	9.67	33.19	22.49
No	0	0	0	0	0	0
No	15.33	23	14.67	22	0.884	0.909	26.33	22.33	29.33	23	11.71	13.32
No	43.33	51.33	15.67	21	0.422	0.546
No	14.67	27.33	16	27.33	1.336	0.867
No	16.33	26	14	24.33	0.86	0.577	16.33	10.67	0	0	6.55	0
Yes	11.67	16.67	16.33	29	0.264	0.805
Yes	14.33	22.33	15	23.67	1.255	1.092
Yes	15.67	24.33	20	29.33	0.569	0.302
Yes	14.33	23.67	14.33	22.33	0.92	1.152	0	0	14	10.33	0	7.322
Yes	15.33	23.33	15	24	1.507	1.103
Yes	14.67	27.33	16	27.33	1.336	0.867
Yes	10	17.33	16.33	23	0.378	0.348	17.67	11	14.67	11	9.15	4.097
Yes	14.33	23.67
Yes	17	22.67	15.33	23.67	0.466	1.465	15.67	11.33	14	10.67	9.248	3.925
Yes	15	23.33	15.67	24	1.001	1.256
Yes	17.67	32	18	33	1.344	1.796
Yes	0	0	0	0	0	0	14.33	9.67	18.33	14.67	9.788	5.384
No	15.33	23.33	16	25.67	0.533	0.369	39.33	29.67	40.67	32.33	14	10.03
No	18	27.33	19	26.33	0.696	0.484
No	16.33	26	18.33	26.67	0.595	0.883	22.67	16.33	29.67	24	13.95	13.6
No	18.33	23.67	14.33	25.67	0.39	0.46
No	0	0	18.33	26.67	0	0
No	17.67	25	16.67	25	0.887	0.693	50	43.33	0	0	0	26.88
No	0	0	0	0	0	0
No							15.33	11	14	12	4.379	3.263
No	16	25	16.67	25.67	0.841	9.511	36.33	33	38.67	31.33	8.255	6.77
No	0	0	0	0	0	0	27.67	22.67	0	0	7.187	0
No	16.67	24.33	15.67	24	1.229	1.007
No	30	42.67	26.67	38	0.293	0.535	29	23.33	28	23.67	8.291	4.526
No	15	25	15.33	23.33	1.151	0.954	25.33	22	15.33	10.33	4.808	10.6
No	14	22	16.67	25.67	0.427	1.22
No	15.67	26.33	16.67	24.33	0.896	0.385	16.33	11	13.33	10.33	4.698	7.175
No	16.67	24.33	16.67	26.33	0.854	1.008
No	18.67	28.33	20.33	26.67	0.477	0.289
No	16	24.67	16	25.67	1.026	0.622
No	16	26	14.33	23.33	1.219	0.463
No	18.33	27	14.67	22.33	0.489	0.348	44.33	37	48.67	39	37.53	43.49
No	31	41	0	0	0	0
No	15.67	25	17.67	27.67
No	16	23.33	17.33	26.33	0.657	0.783
No	16	26	15	25.67	1.881	1.476
No	17.67	25	16.67	25	0.887	0.693
No	16	24	15.67	25.67	0.872	1.197	17.33	14	16	13	5.323	4.133
No	15.67	25.67	12.33	25.33	0.62	0.535	15.67	11	0	0	8.365	0
No	0	0	0	0	0	0	16.33	10.67	18	10.67	6.501	7.519
Yes	38	47.67	15.67	23.67	0.396	0.598	14.67	11.33	0	0	7.31	0
Yes	0	0	0	0	0	0	27.67	23.67	19.33	13	11.77	18.85
Yes							15	11.67	0	0	16.96	0
Yes	15.67	25	17.67	27.67
Yes	16.33	27.67	0	0	0	0
Yes	0	0	0	0	0	0
Yes	0	0	0	0	0	0
Yes	18.67	28	16.67	26.33	0.298	0.305
Yes	14.67	23	17.67	24.67	0.202	0.322
Yes	0	0	16.33	26	0	0	19.67	11.67	19	12.33	7.163	16.38
Yes	16	26	15	25.67	1.881	1.476
Yes	15	22	16.33	25.33	0.606	0.94	16	11	18	11.67	23.59	71.04
Yes	0	0	0	0	0	0
Yes	14	21.67	15.67	22.67	1.022	1.086
Yes	18.33	27	16.67	24.33	0.864	0.627
